# Supplementary material for: Identification and Functional Characterization of the RcFAH12 Promoter from Castor Bean in Arabidopsis thaliana
Source: MDPI journal article supplement (doi:10.3390/separations10010002), 2022-12-21
Supplement: s1 [file s1]

Archive with 3 entries (3 files):
- separations-2006985-Supplementary Figure S1.pdf
- separations-2006985-Supplementary Figure S2.pdf
- separations-2006985-Supplementary Table S1.pdf
