# Supplementary material for: Identification and Functional Characterization of the RcFAH12 Promoter from Castor Bean in Arabidopsis thaliana
Source: MDPI journal article supplement (doi:10.3390/separations10010002), 2022-12-21
Supplement: s1 [file s1 › separations-2006985-Supplementary Figure S1.pdf]

| Genomic Position | Strand | Sequence    | Annotations |
|------------------|--------|-------------|-------------|
| -2506~-2407      | +      | AGGTTTGGTG  | AGGTTTGGTG  |
|                  | -      | TCCAAAACCA  | TCCAAAACCA  |
| -2406~-2307      | +      | GTCACCTTAC  | GTCACCTTAC  |
|                  | -      | CAGTGGGAATG | CAGTGGGAATG |
| -2306~-2207      | +      | AATGGTGGTC  | AATGGTGGTC  |
|                  | -      | TTACCACCAG  | TTACCACCAG  |
| -2206~-2107      | +      | CTAAATCAT   | CTAAATCAT   |
|                  | -      | GATTTAGTAA  | GATTTAGTAA  |
| -2106~-2007      | +      | AATTTTTCCA  | AATTTTTCCA  |
|                  | -      | TTAAAAGGT   | TTAAAAGGT   |
| -2006~-1907      | +      | GATATTCGCT  | GATATTCGCT  |
|                  | -      | CTATAAGCGA  | CTATAAGCGA  |
| -1906~-1807      | +      | AGACATCCAT  | AGACATCCAT  |
|                  | -      | TCTGTAGSTA  | TCTGTAGSTA  |
| -1806~-1707      | +      | CATTTTGTAC  | CATTTTGTAC  |
|                  | -      | GATAAACATG  | GATAAACATG  |
| -1706~-1607      | +      | TATTGTTTAA  | TATTGTTTAA  |
|                  | -      | ATAACAAATT  | ATAACAAATT  |
| -1606~-1507      | +      | CCCTTTCACA  | CCCTTTCACA  |
|                  | -      | GGGAAAGTGT  | GGGAAAGTGT  |
| -1506~-1407      | +      | CCAACAATA   | CCAACAATA   |
|                  | -      | GGTGTATTAT  | GGTGTATTAT  |
| -1406~-1307      | +      | AAACAATTTC  | AAACAATTTC  |
|                  | -      | TTTGTAAAG   | TTTGTAAAG   |
| -1306~-1207      | +      | AAGTATAAGT  | AAGTATAAGT  |
|                  | -      | TTCATATTCA  | TTCATATTCA  |
| 1206~-1107       | +      | TTGAGAGGTTG | TTGAGAGGTTG |
|                  | -      | AACCTCCAC   | AACCTCCAC   |
| -1106~-1007      | +      | TCGAGGCGAG  | TCGAGGCGAG  |
|                  | -      | AGCTCCGTCG  | AGCTCCGTCG  |
| -1006~-907       | +      | CTAATTCCTG  | CTAATTCCTG  |
|                  | -      | GATTAAGGAC  | GATTAAGGAC  |
| -906~-807        | +      | TTATTGTTAT  | TTATTGTTAT  |
|                  | -      | AATAACAATA  | AATAACAATA  |
| -806~-707        | +      | TAAATAAATT  | TAAATAAATT  |
|                  | -      | ATTTATTTAA  | ATTTATTTAA  |
| -706~-607        | +      | TTATTTAATA  | TTATTTAATA  |
|                  | -      | AATAAATTAT  | AATAAATTAT  |
| -606~-507        | +      | ATTTTAAGAA  | ATTTTAAGAA  |
|                  | -      | TAAATTTCTT  | TAAATTTCTT  |
| -506~-407        | +      | TTTTTAATAT  | TTTTTAATAT  |
|                  | -      | AAAAATTTATA | AAAAATTTATA |
| -406~-307        | +      | AGTAAATATA  | AGTAAATATA  |
|                  | -      | TCATTTATAT  | TCATTTATAT  |
| -306~-207        | +      | GAAAGTTGAA  | GAAAGTTGAA  |
|                  | -      | CTTTCAACTT  | CTTTCAACTT  |
| -206~-107        | +      | GTGAGGCGAT  | GTGAGGCGAT  |
|                  | -      | CACCTCCGCTA | CACCTCCGCTA |
| -106~-7          | +      | GGGGATCCTT  | GGGGATCCTT  |
|                  | -      | CCCTTAGGAA  | CCCTTAGGAA  |
| -6~+94           | +      | CACCTCAAA   | CACCTCAAA   |
|                  | -      | GTGGAGTTTA  | GTGGAGTTTA  |
| +95~+99          | +      | ATAAG       | ATAAG       |
|                  | -      | TATTC       | TATTC       |
