# Supplementary material for: Identification and Functional Characterization of the RcFAH12 Promoter from Castor Bean in Arabidopsis thaliana
Source: MDPI journal article supplement (doi:10.3390/separations10010002), 2022-12-21
Supplement: s1 [file s1 › separations-2006985-Supplementary Figure S2.pdf]

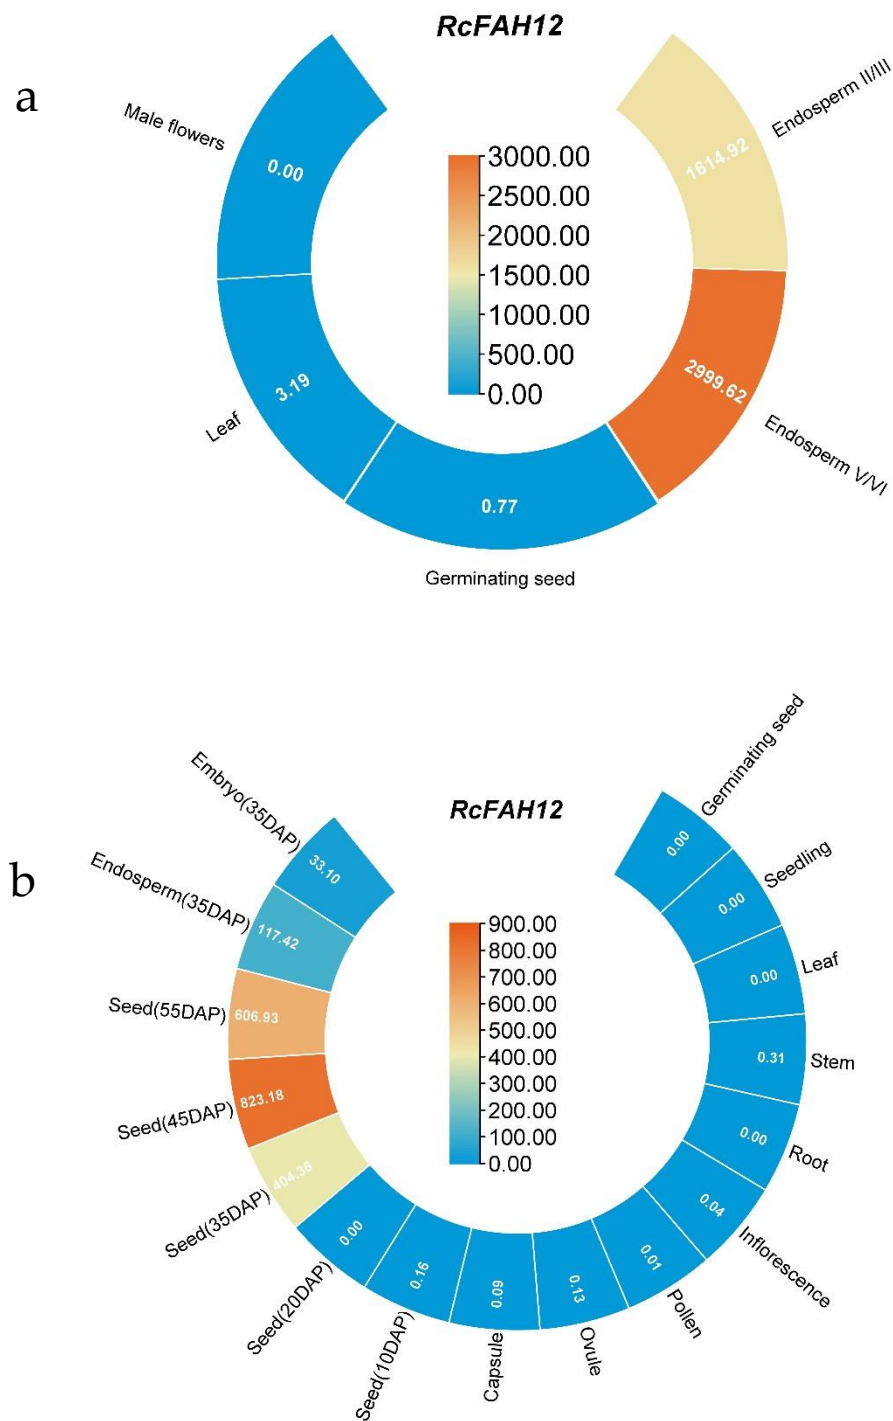

**Supplementary Figure S2.** Heatmap of *RcFAH12* expression level (fragments per kilobase of transcript per million fragments sequenced, FPKM) in different tissues of castor bean.

a: Data from Brown et al 2012.

b: Data from Han et al. 2022
