# Supplementary material for: Identification and Functional Characterization of the RcFAH12 Promoter from Castor Bean in Arabidopsis thaliana
Source: MDPI journal article supplement (doi:10.3390/separations10010002), 2022-12-21
Supplement: s1 [file s1 › separations-2006985-Supplementary Table S1.pdf]

Supplementary Table S1. Primer design with *RcFAH12* Promoter deletion mutant.

1

| Primer name          | Primer sequence 5'→3'                                | Description                                                                |
|----------------------|------------------------------------------------------|----------------------------------------------------------------------------|
| C1                   | AGCTTAAGAATGGGAGGTGGT                                | For <i>RcFAH12</i> intermediate fragment                                   |
| C2                   | GTCATGTAGCCTGTTTCTTTAAG                              |                                                                            |
| FSO                  | GATCACATACTTGCAGCACACT                               |                                                                            |
| 3' RACE Outer primer | TACCGTCGTTCCACTAGTGATT                               | For 3'RACE                                                                 |
| FSI                  | CTTTGCTACAGTGCCACATTAC                               |                                                                            |
| 3' RACE Inner primer | CGCGGATCCTCCACTAGTGATTTCCTACTATAGG                   |                                                                            |
| FWO                  | CCAACAATGTCATCAGCCAGCT                               | For 5'RACE                                                                 |
| 5' RACE Outer primer | CATGGCTACATGCTGACAGCCTA                              |                                                                            |
| FWI                  | GCAGACATCATAGGCAACATAG                               |                                                                            |
| 5' RACE Inner primer | CGCGGATCCACAGCCTACTGATGATCAGTCGATG                   | For <i>FP2605</i>                                                          |
| FAH12PF              | AACTGCAGTTTGTGTTGGTGACGCTAGCA                        |                                                                            |
| FAH12PR              | GAAGATCTTATCTCAGAGAAGAGAAATGT                        |                                                                            |
| FPF(1,5)             | TCCTCTAGAGTCGACCTGCAGCTGCAGGTTTGTT<br>GGTGACGC       | For <i>FP2605</i> , <i>FP494</i> forward                                   |
| FPR(1,2,3,4)         | AACTAGTCAGATCTACCATGGCCATGGAGATCTT<br>ATCTCAGAGAAGA  | For <i>FP2605</i> , <i>FP1611</i> , <i>FP677</i> ,<br><i>FP256</i> reverse |
| FPF(2,7)             | TCCTCTAGAGTCGACCTGCAGCTGCAGAGAAAT<br>CCAACAATAACG    | For <i>FP1611</i> , <i>FP502</i> forward                                   |
| FPF(3)               | TCCTCTAGAGTCGACCTGCAGCTGCAGGAGTTTC<br>TAGTTCAACTTCT  | For <i>FP677</i> forward                                                   |
| FPF(4)               | TCCTCTAGAGTCGACCTGCAGCTGCAGGGACAG<br>CTGTTTAAGAA     | For <i>FP256</i> forward                                                   |
| FPR(5)               | AACTAGTCAGATCTACCATGGCCATGGAGATAA<br>TGCAAAGGA       | For <i>FP494</i> reverse                                                   |
| FPF(6)               | TCCTCTAGAGTCGACCTGCAGCTGCAGACCTCTG<br>TTAAAATCTGTTAC | For <i>FP584</i> forward                                                   |
| FPR(6)               | AACTAGTCAGATCTACCATGGCCATGGATCCAA<br>ATTTTGAAGC      | For <i>FP584</i> reverse                                                   |
| FPR(7)               | AACTAGTCAGATCTACCATGGCCATGGACGCTTG<br>TCAAAATT       | For <i>FP502</i> reverse                                                   |
| FPF(8)               | TCCTCTAGAGTCGACCTGCAGCTGCAGACAGCTC<br>ACTTTTCACTT    | For <i>FP613</i> forward                                                   |
| FPR(8)               | AACTAGTCAGATCTACCATGGCCATGGCGAGAC<br>CATTATATATTAA   | For <i>FP613</i> reverse                                                   |
| 1303F                | CGCGCGTTGGCCGATTCATTA                                | For identification of recombinant plasmids                                 |
| 1303R                | CGCGATCCAGACTGAATGCCAC                               |                                                                            |
| qGUSF1               | AACCGTTCTACTTTACTGGCTTTGG                            | For identification of transgenic Arabidopsis                               |
| qGUSR1               | GCATCTCTTCAGCGTAAGGGTAAT                             |                                                                            |

2
